# Supplementary material for: Multiepitope Subunit Vaccine Design against COVID‐19 Based on the Spike Protein of SARS‐CoV‐2: An In Silico Analysis
Source: Hindawi journal article supplement (doi:10.1155/2020/8893483), 2020-01-01

# AIRs vs i-RMSD

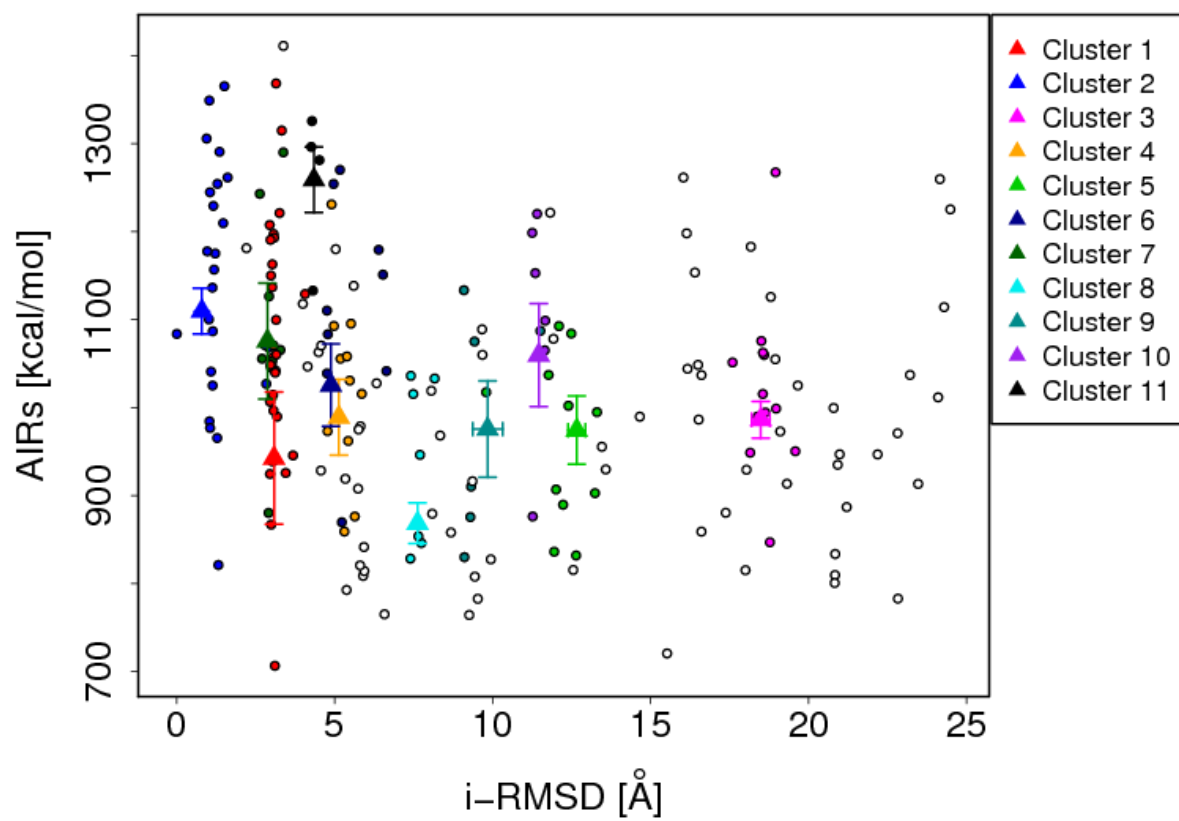

# Electrostatics vs i-RMSD

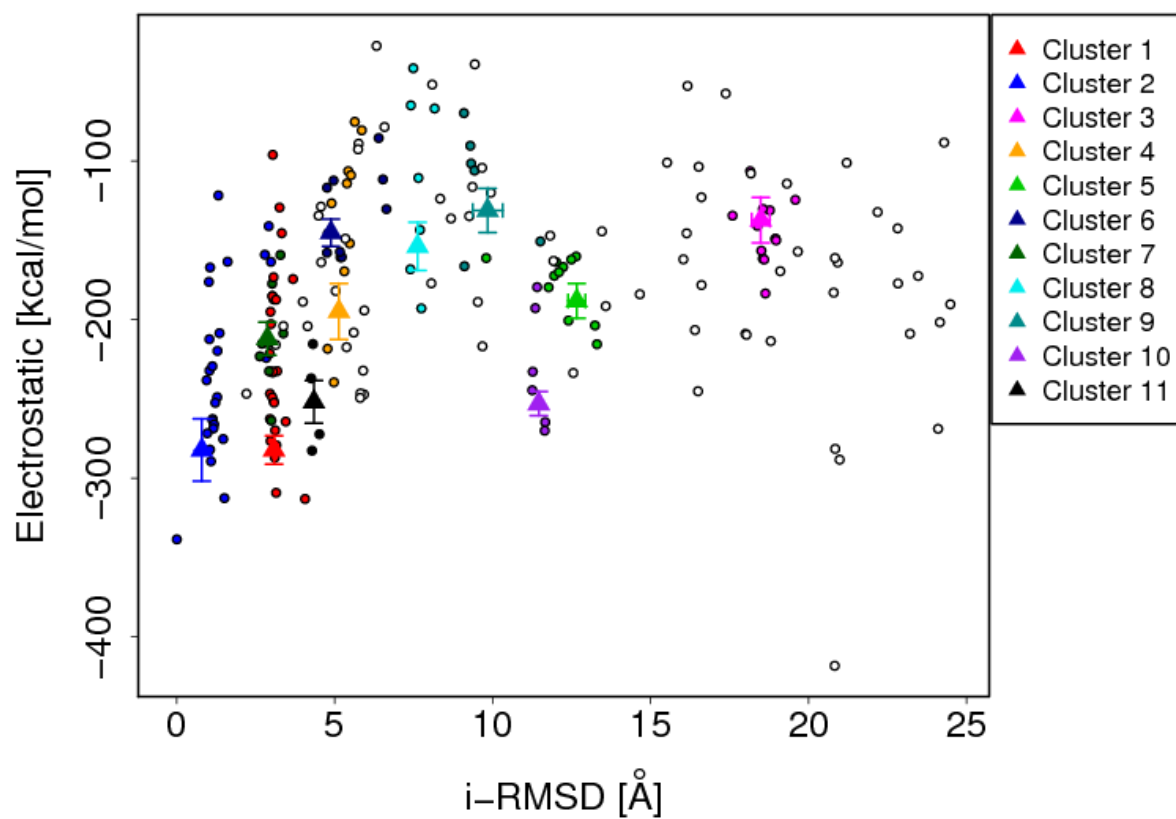

# HADDOCK score vs FCC

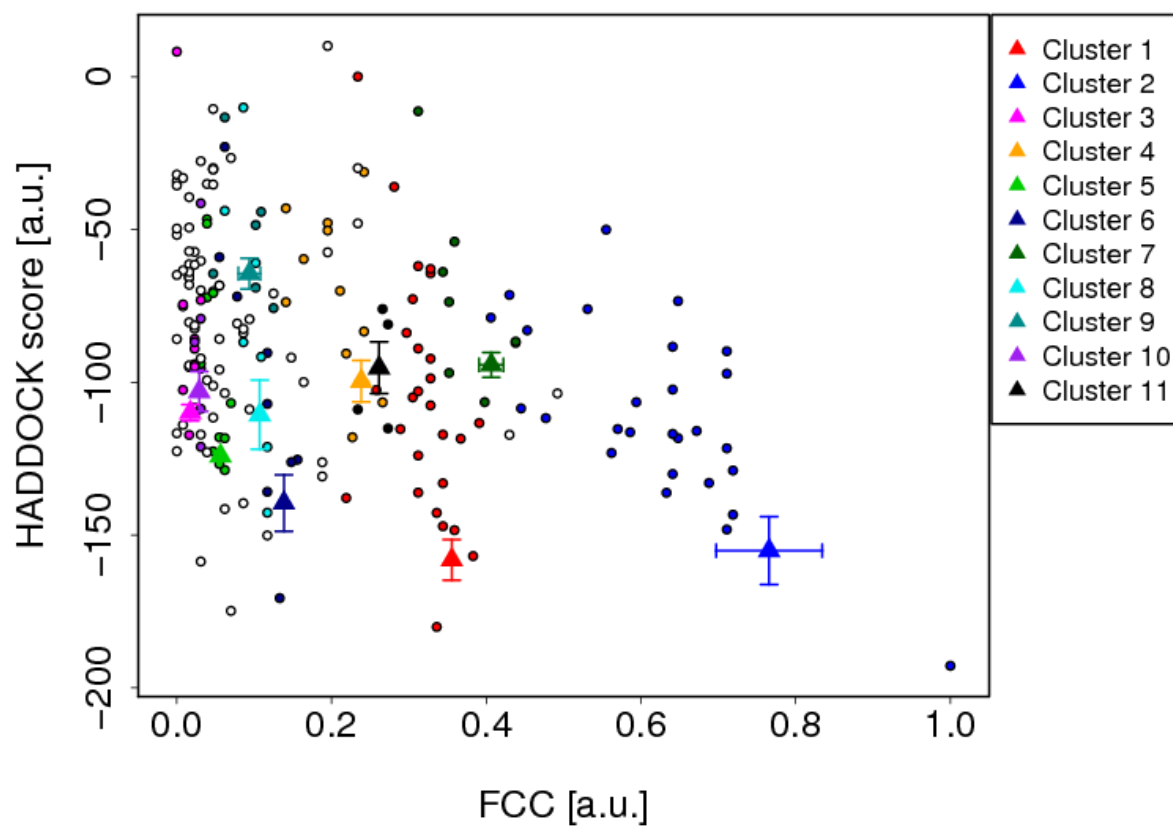

# HADDOCK score vs i-l-RMSD

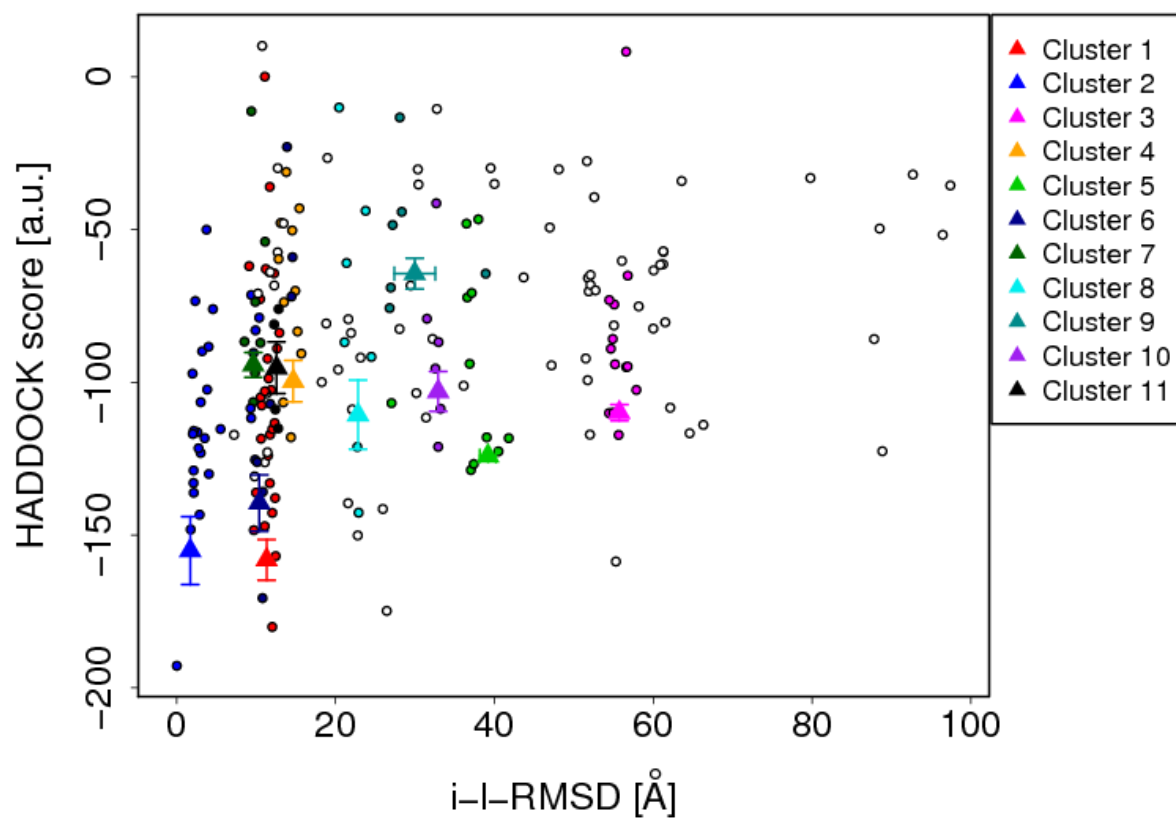

# HADDOCK score vs i-RMSD

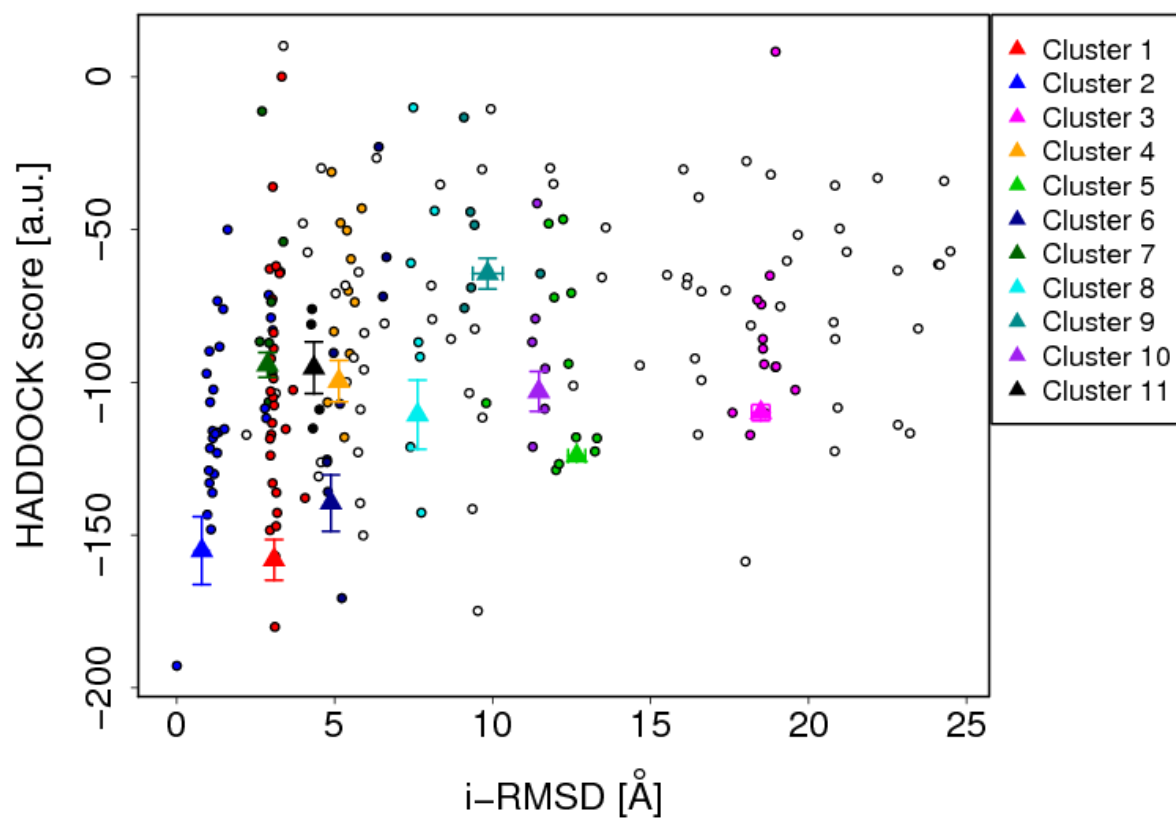

# HADDOCK score vs I-RMSD

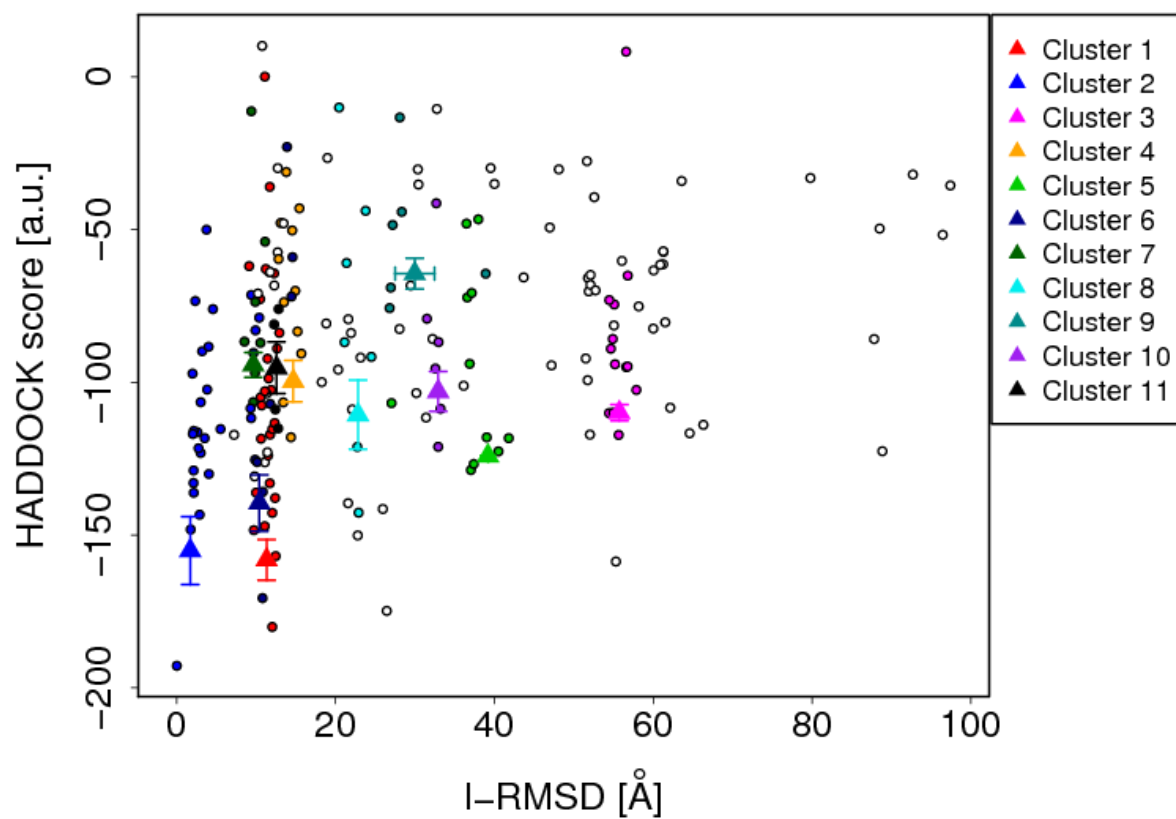

## van der Waals vs i-RMSD

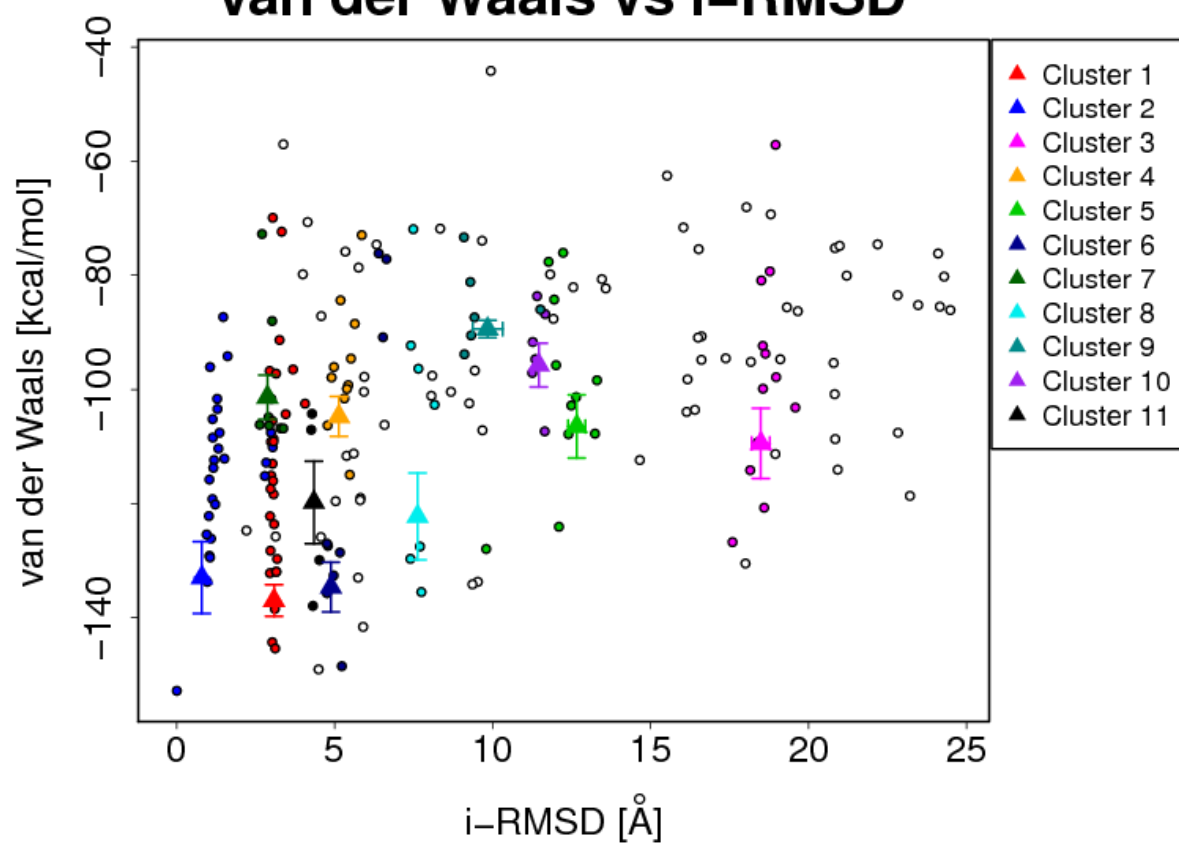

Supplement: f1 [file 8893483.f1.zip]
